# Supplementary material for: One-dimensional Bi2O3 QD-decorated BiVO4 nanofibers: electrospinning synthesis, phase separation mechanism and enhanced photocatalytic performance
Source: Royal Society of Chemistry journal article supplement (doi:10.1039/c4ra11065j), 2014-11-25
Supplement: c4ra11065j1.pdf [file c4ra11065j1.pdf]

Supporting Information for  
One-dimensional Bi<sub>2</sub>O<sub>3</sub> QDs decorated BiVO<sub>4</sub> nanofibers:  
electrospinnig synthesis, phase separation mechanism and  
enhanced photocatalytic performance

*Chade Lv, Gang Chen\*, Jingxue Sun\*, Chunshuang Yan, Hongjun Dong and Chunmei Li*

Department of Chemistry, Harbin Institute of Technology, Harbin, 150001, People's Republic of China.

\*Corresponding author: Fax: +86-451-86413753; Tel: +86-451-86413753;

E-mail: gchen@hit.edu.cn (Gang Chen), jxsun@hit.edu.cn (Jingxue Sun).

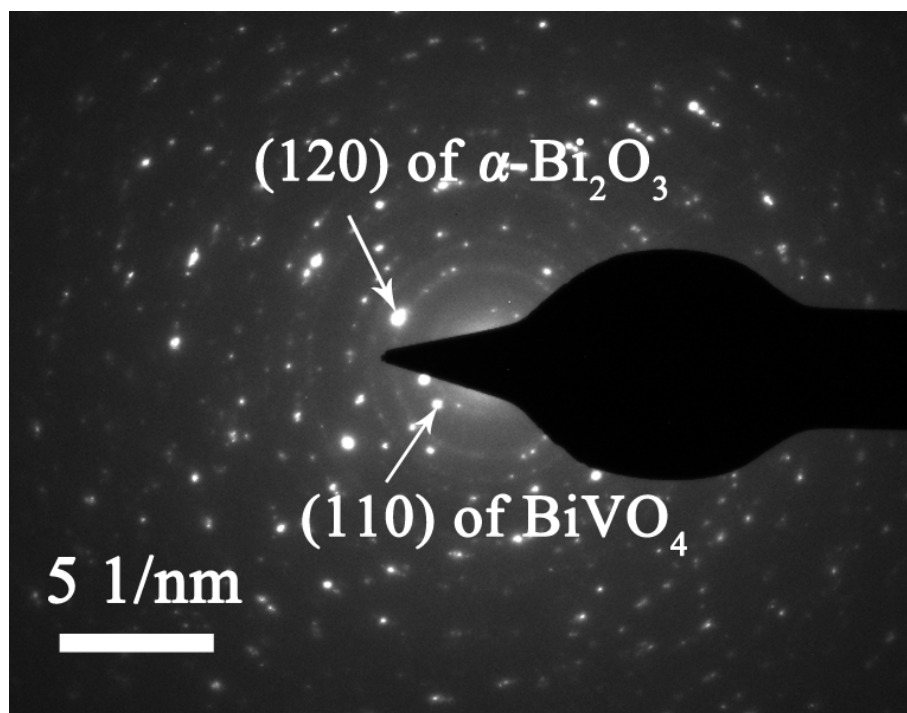

Fig. S1 SAED pattern taken at the surface of BQDs-BVNFs

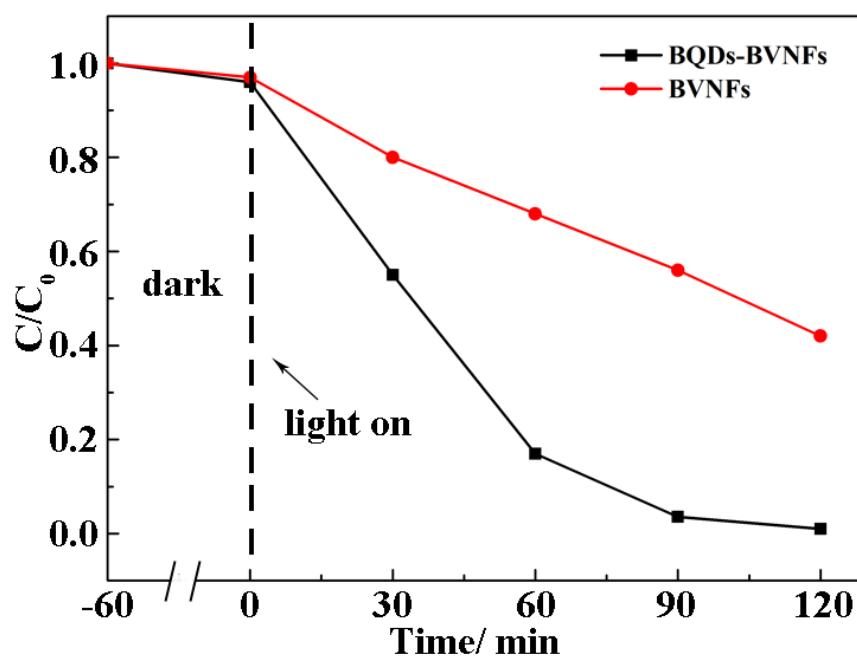

Fig. S2 Photocatalytic degradation of RhB under visible light without  $\text{H}_2\text{O}_2$ .
